# Supplementary material for: How Do Firms Feel About Participation by Their Peers in the Regulatory Design Process? An Online Survey Experiment Testing the Substantive Change and Spillover Mechanisms
Source: Atypon-hosted journal article supplement (doi:10.1287/stsc.2019.0084), 2019-06-01
Supplement: stsc.2019.0084.sm1.pdf [file stsc.2019.0084.sm1.pdf]

## **Online Appendix**

Includes Supplementary Information for Reviewers. Not intended for Publication.

## Appendix A: 4-Digit ISIC Activities Related to Hazardous Chemicals

| Code | Description                                                                                               |
|------|-----------------------------------------------------------------------------------------------------------|
| 0710 | Mining of iron ores                                                                                       |
| 0721 | Mining of uranium and thorium ores                                                                        |
| 0729 | Mining of other non-ferrous metal ores                                                                    |
| 13   | Manufacture of textiles                                                                                   |
| 131  | Spinning, weaving and finishing of textiles                                                               |
| 1511 | Tanning and dressing of leather; dressing and dyeing of fur                                               |
| 1520 | Manufacture of footwear                                                                                   |
| 1621 | Manufacture of veneer sheets and wood-based panels                                                        |
| 1622 | Manufacture of builders' carpentry and joinery                                                            |
| 1623 | Manufacture of wooden containers                                                                          |
| 1629 | Manufacture of other products of wood; manufacture of articles of cork, straw and plaiting materials      |
| 1701 | Manufacture of pulp, paper and paperboard                                                                 |
| 1702 | Manufacture of corrugated paper and paperboard and of containers of paper and paperboard                  |
| 1709 | Manufacture of other articles of paper and paperboard                                                     |
| 1812 | Service activities related to printing                                                                    |
| 182  | Reproduction of recorded media                                                                            |
| 1820 | Reproduction of recorded media                                                                            |
| 1920 | Manufacture of refined petroleum products                                                                 |
| 2011 | Manufacture of basic chemicals                                                                            |
| 2012 | Manufacture of fertilizers and nitrogen compounds                                                         |
| 2013 | Manufacture of plastics and synthetic rubber in primary forms                                             |
| 2021 | Manufacture of pesticides and other agrochemical products                                                 |
| 2022 | Manufacture of paints, varnishes and similar coatings, printing ink and mastics                           |
| 2023 | Manufacture of soap and detergents, cleaning and polishing preparations, perfumes and toilet preparations |
| 2029 | Manufacture of other chemical products n.e.c.                                                             |
| 2100 | Manufacture of pharmaceuticals, medicinal chemical and botanical products                                 |
| 2211 | Manufacture of rubber tires and tubes; retreading and rebuilding of rubber tires                          |
| 2219 | Manufacture of other rubber products                                                                      |
| 2391 | Manufacture of refractory products                                                                        |
| 2394 | Manufacture of cement, lime and plaster                                                                   |
| 2592 | Treatment and coating of metals; machining                                                                |
| 2593 | Manufacture of cutlery, hand tools and general hardware                                                   |
| 2610 | Manufacture of electronic components and boards                                                           |
| 2620 | Manufacture of computers and peripheral equipment                                                         |
| 2630 | Manufacture of communication equipment                                                                    |
| 2640 | Manufacture of consumer electronics                                                                       |
| 2670 | Manufacture of optical instruments and photographic equipment                                             |
| 2680 | Manufacture of magnetic and optical media                                                                 |
| 2720 | Manufacture of batteries and accumulators                                                                 |
| 2731 | Manufacture of fiber optic cables                                                                         |
| 2732 | Manufacture of other electronic and electric wires and cables                                             |
| 2733 | Manufacture of wiring devices                                                                             |
| 3211 | Manufacture of jewelry and related articles                                                               |
| 3520 | Manufacture of gas; distribution of gaseous fuels through mains                                           |
| 3600 | Water collection, treatment and supply                                                                    |
| 3700 | Sewerage                                                                                                  |
| 4520 | Maintenance and repair of motor vehicles                                                                  |
| 4540 | Sale, maintenance and repair of motorcycles and related parts and accessories                             |
| 4661 | Wholesale of solid, liquid and gaseous fuels and related products                                         |
| 4752 | Retail sale of hardware, paints and glass in specialized stores                                           |
| 4912 | Freight rail transport                                                                                    |
| 492  | Other land transport                                                                                      |
| 4922 | Other passenger land transport                                                                            |
| 4923 | Freight transport by road                                                                                 |
| 493  | Transport via pipeline                                                                                    |
| 4930 | Transport via pipeline                                                                                    |

|      |                                                       |
|------|-------------------------------------------------------|
| 5012 | Sea and coastal freight water transport               |
| 5022 | Inland freight water transport                        |
| 52   | Warehousing and support activities for transportation |
| 521  | Warehousing and storage                               |
| 5210 | Warehousing and storage                               |
| 522  | Support activities for transportation                 |
| 5221 | Service activities incidental to land transportation  |
| 5222 | Service activities incidental to water transportation |
| 5224 | Cargo handling                                        |
| 5229 | Other transportation support activities               |
| 812  | Cleaning activities                                   |
| 8129 | Other building and industrial cleaning activities     |
| 9523 | Repair of footwear and leather goods                  |

## Appendix B: Recruitment and Screening into the Online Survey

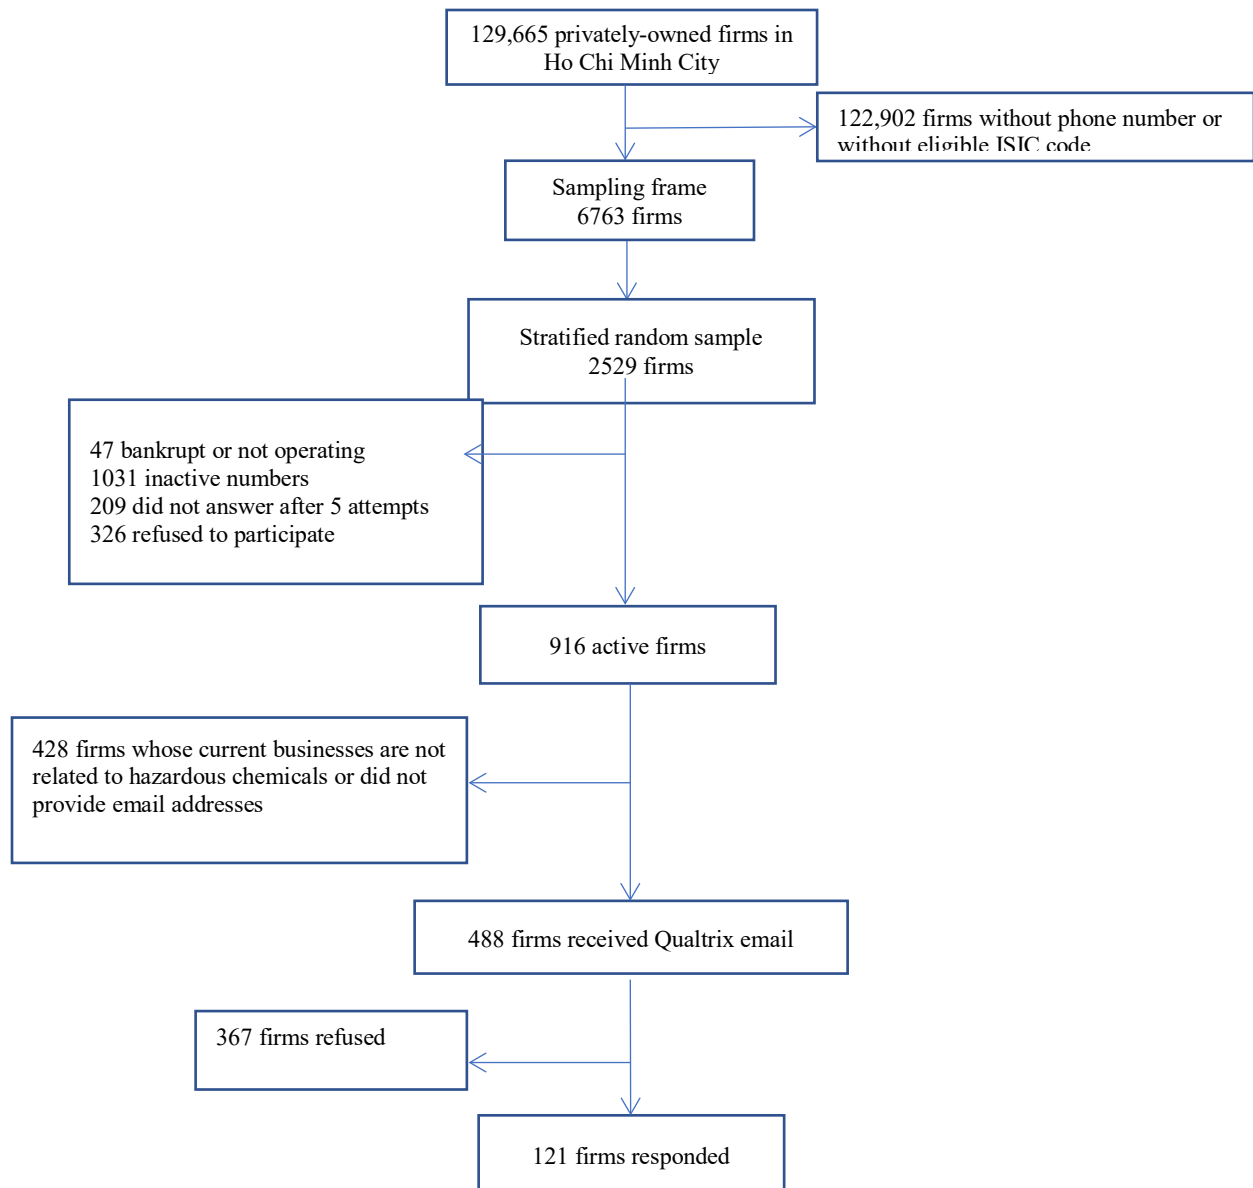

## Appendix C: Official Invitation Letter from VCCI to Respondents

PHÒNG THƯƠNG MẠI  
VÀ CÔNG NGHIỆP VIỆT NAM

Số: 1321 /PTM-PC

Vv Mời cho ý kiến về Dự thảo QCVN về  
ATLĐ trong sản xuất, kinh doanh, sử dụng, bảo  
quản và vận chuyển hóa chất nguy hiểm

CỘNG HÒA XÃ HỘI CHỦ NGHĨA VIỆT NAM  
Độc lập – Tự do – Hạnh phúc

Hà Nội, ngày 12 tháng 6 năm 2015

Kính gửi: Ban lãnh đạo Quý Doanh nghiệp

Phòng Thương mại và Công nghiệp Việt Nam (VCCI) đang triển khai Dự án “Doanh nghiệp tham gia góp ý dự thảo văn bản pháp luật”, đây là một trong những nỗ lực nhằm tăng cường vai trò của cộng đồng doanh nghiệp trong soạn thảo chính sách, pháp luật, từ đó góp phần xây dựng môi trường kinh doanh theo hướng thuận lợi hơn cho doanh nghiệp.

Thực hiện một trong các hoạt động của Dự án, VCCI trân trọng gửi tới Quý Ông/Bà hai phiên bản (phiên bản tháng 12/2014 và tháng 4/2015) của Dự thảo Quy chuẩn kỹ thuật quốc gia về an toàn lao động trong sản xuất, kinh doanh, sử dụng, bảo quản và vận chuyển hóa chất nguy hiểm do Bộ Lao động, Thương binh và Xã hội soạn thảo. Rất mong Quý Ông/Bà cho ý kiến (dựa trên kinh nghiệm hoạt động kinh doanh của mình) vào các phiên bản này trên website thu thập thông tin do Dự án thiết kế (đường link sẽ được gửi qua email). Ý kiến của Quý Ông/Bà sẽ được tổng hợp gửi tới Ban soạn thảo và có ý nghĩa quan trọng để hoàn thiện Dự thảo, đảm bảo tính hợp lý, minh bạch, khả thi của văn bản.

Để cảm ơn sự hợp tác của Quý Ông/Bà, VCCI trân trọng gửi tặng người trả lời một thẻ nhớ USB có hình thức như một thẻ tín dụng, đặt rất vừa vặn trong ví. Xin vui lòng để lại tên và địa chỉ người nhận để có thể gửi quà tặng đến tay Quý Ông/ Bà được nhanh nhất. Chúng tôi cam kết mọi thông tin cung cấp sẽ được bảo mật và chỉ được sử dụng vào mục đích nghiên cứu.

Trân trọng cảm ơn và kính chúc Quý Ông/Bà nhiều sức khỏe, Quý Doanh nghiệp kinh doanh thành công.

Nơi nhận:

- Như trên;
- Lưu VT, PC.

TL. CHỦ TỊCH  
TRƯỞNG BAN PHÁP CHẾ  
PHÒNG THƯƠNG MẠI  
VÀ CÔNG NGHIỆP  
VIỆT NAM  
Đâu Anh Tuấn

### Translation:

Dear Business Leader:

The project “Business Participation in the Drafting of Business Regulations” is a recent initiative of the Vietnamese Chamber of Commerce and Industry (VCCI), which is part of the larger effort to strengthen the role of businesses in the process of policy making and hence improve the business environment in Vietnam.

In pursuit of this goal, we would like to present to you the two versions of the **Draft National Technical Regulation on Occupational Safety in Production, Commerce, Usage, Storage and Transportation of Hazardous Chemicals**, developed by the Labor Safety Bureau of the Ministry of Labor, Invalids and Social Affairs. At this stage, these versions are being compared and reviewed before one of them is sent for final evaluation. In order to select a better version for the evaluation, **we ask that you spare some of your valuable time comment and give suggestions on the draft via link in the email.** By giving your input, you will directly raise your opinion with drafters while contributing to the improvement of the draft.

Upon receiving your completed answers, we would like to send you a credit-card shaped USB (data storage device) that will nicely fit into your wallet. If you are interested, please leave your name and the mailing address to which we can send you our gift. We will delete this information as soon as we send it. From that point on, all data will be analyzed anonymously. **If you do not want the gift, please do not feel compelled to leave your contact information.**

Thank you and we wish you every success in your business ventures.

**Appendix D:  
Relationship between Evaluations of Labor Safety and Business Prospects, by Clause**

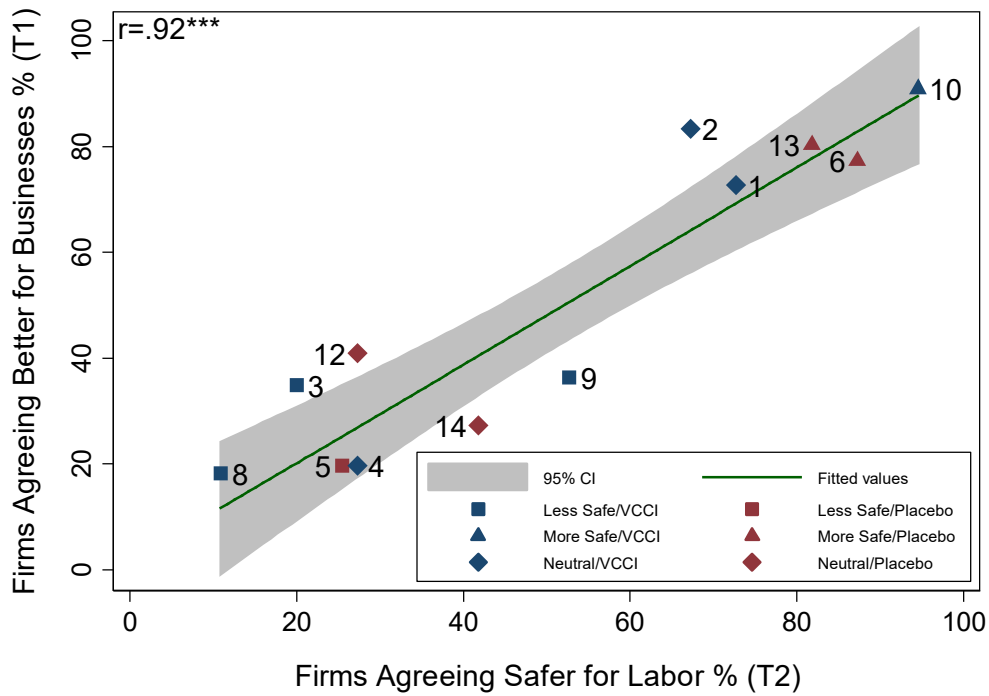

**Note:** Less Safe, More Safe, and Neutral were evaluations proposed by independent chemical safety consultants that were hired by our project. These are also shown in Table 5 of manuscript.

**Appendix E: Replication of Table 6 with Respondent Fixed Effects**

| <i>DV: Respondent Selected Revised Draft</i><br>Clause=1 | Unadjusted<br>(1)   | Evaluation<br>(2)   |
|----------------------------------------------------------|---------------------|---------------------|
| VCCI_Clause=1                                            | 0.074***<br>(0.022) | 0.173***<br>(0.024) |
| Expert Opinion (Neutral=1)                               |                     | 0.217***<br>(0.028) |
| Expert Opinion (More Safe=1)                             |                     | 0.651***<br>(0.041) |
| Constant                                                 | 0.468***<br>(0.013) | 0.143***<br>(0.027) |
| Respondent Fixed Effects                                 | Yes                 | Yes                 |
| Observations                                             | 1,694               | 1,573               |
| Clusters                                                 | 121                 | 121                 |
| R-squared                                                | 0.0690              | 0.277               |
| RMSE                                                     | 0.501               | 0.443               |

All columns use OLS models. Marginal probabilities with standard errors, clustered at respondent level, in parentheses (\*\*\*)  $p < 0.01$ , \*\*  $p < 0.05$ , \*  $p < 0.1$ ).
